# Supplementary material for: Prolonged hypoxia augments l-citrulline transport by System A in the newborn piglet pulmonary circulation
Source: Oxford University Press journal article supplement (doi:10.1093/cvr/cvs186), 2012-06-06
Supplement: cvs186_Supplementary_Data.zip [file cvs186_Supplementary_Data.zip]

Archive with 1 entries (1 files):
- cvs186supp.pdf
