# Supplementary material for: Prolonged hypoxia augments l-citrulline transport by System A in the newborn piglet pulmonary circulation
Source: Oxford University Press journal article supplement (doi:10.1093/cvr/cvs186), 2012-06-06

### Supplemental Figure legend

Supplemental Figure 1. SNAT1 immunolocalization in neonatal piglet lung. Representative lung sections showing: SNAT1 (red) immunolabeling in trachea (A), a pulmonary artery (C), or distal lung (E); merged images of immunolabeling for SNAT1 (red) and eNOS (green) in trachea (B), a pulmonary artery (D) and distal lung (F). Cell nuclei were identified using TO-PRO-3. Arrowheads indicate airway epithelium (epith, A, B); smooth muscle (sm, C,D); and alveolar space (alv, E,F). Secondary antibody control images are shown in G, H. Objective 63X; scale bar, 10  $\mu$ m.

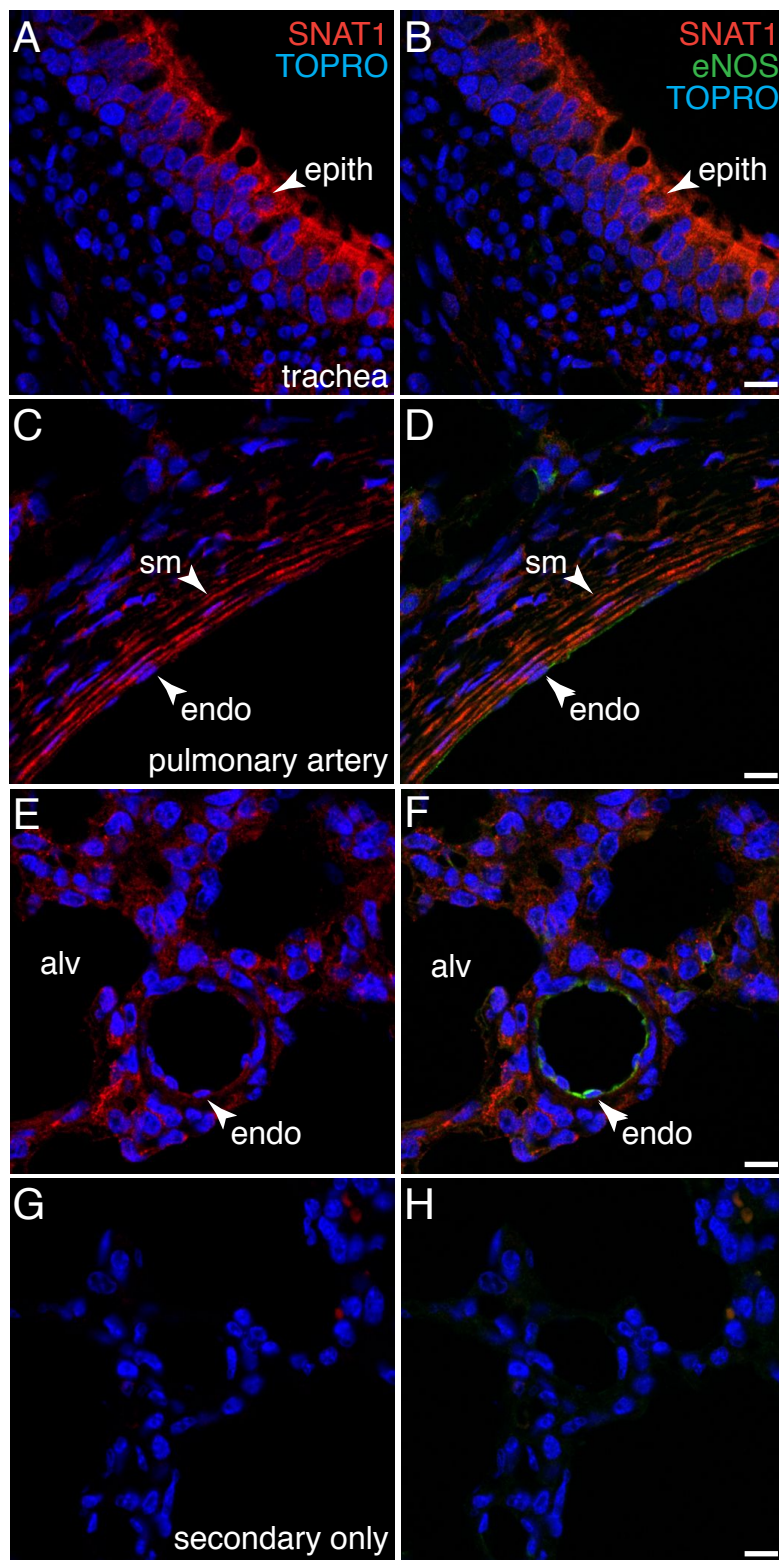

Supplement: cvs186_Supplementary_Data.zip [file cvs186_Supplementary_Data.zip › cvs186supp.pdf]
